# Supplementary material
Source: PubMed Central journal article supplement (PMC7084161)
Supplement: pnas.1920413117.sapp.pdf [file pnas.1920413117.sapp.pdf]

## **Supporting Information Appendix**

### **LDH Inhibition Synergizes with IL-21 to Promote CD8<sup>+</sup> T Cell Stemness and Antitumor Immunity**

Dalton Hermans, Sanjivan Gautam, Juan C. García-Cañaveras, Daniel Gromer, Suman Mitra, Rosanne Spolski, Peng Li, Stephen Christensen, Rosa Nguyen, Jian-Xin Lin, Jangsuk Oh, Ning Du, Sharon Veenbergen, Jessica Fioravanti, Risa Ebina-Shibuya, Christopher Bleck, Leonard M. Neckers, Joshua D. Rabinowitz, Luca Gattinoni, Warren J. Leonard

#### **Contains:**

- 1. Legend to Supplementary Table 1, which is an excel file**
- 2. Supplementary Figures 1-4 and their legends.**

**Table S1.** List of genes from RNA-Seq analysis in pre-activated CD8<sup>+</sup> T cells, either no treatment or treated with IL-2, IL-21, IL-2+LDHi, or IL-21+LDHi. **Tab 1:** Gene expression for all genes in cells receiving NC, IL-2, IL-21, IL-2+LDHi, or IL-21+LDHi. Two biological replicates were analyzed. **Tab 2:** Differentially expressed genes for IL-2 vs. NC. **Tab 3:** Differentially expressed genes for IL-21 vs. NC. **Tab 4:** Differentially expressed genes for IL-2+LDHi versus IL-2. **Tab 5:** Differentially expressed genes for IL-21+LDHi versus IL-21. **Tab 6:** Differentially expressed genes for IL-2 versus IL-21. **Tab 7:** Differentially expressed genes for IL-2+LDHi versus IL-21+LDHi. **Tab 8:** Gene expression for metabolism genes, corresponding to **Fig. 1H**. **Tab 9:** Gene expression for metabolism genes, corresponding to **Fig. 2H**. **Tab 10:** Gene expression for cell cycle genes, corresponding to **Fig. S3G**.

**Figure S1**

**A**

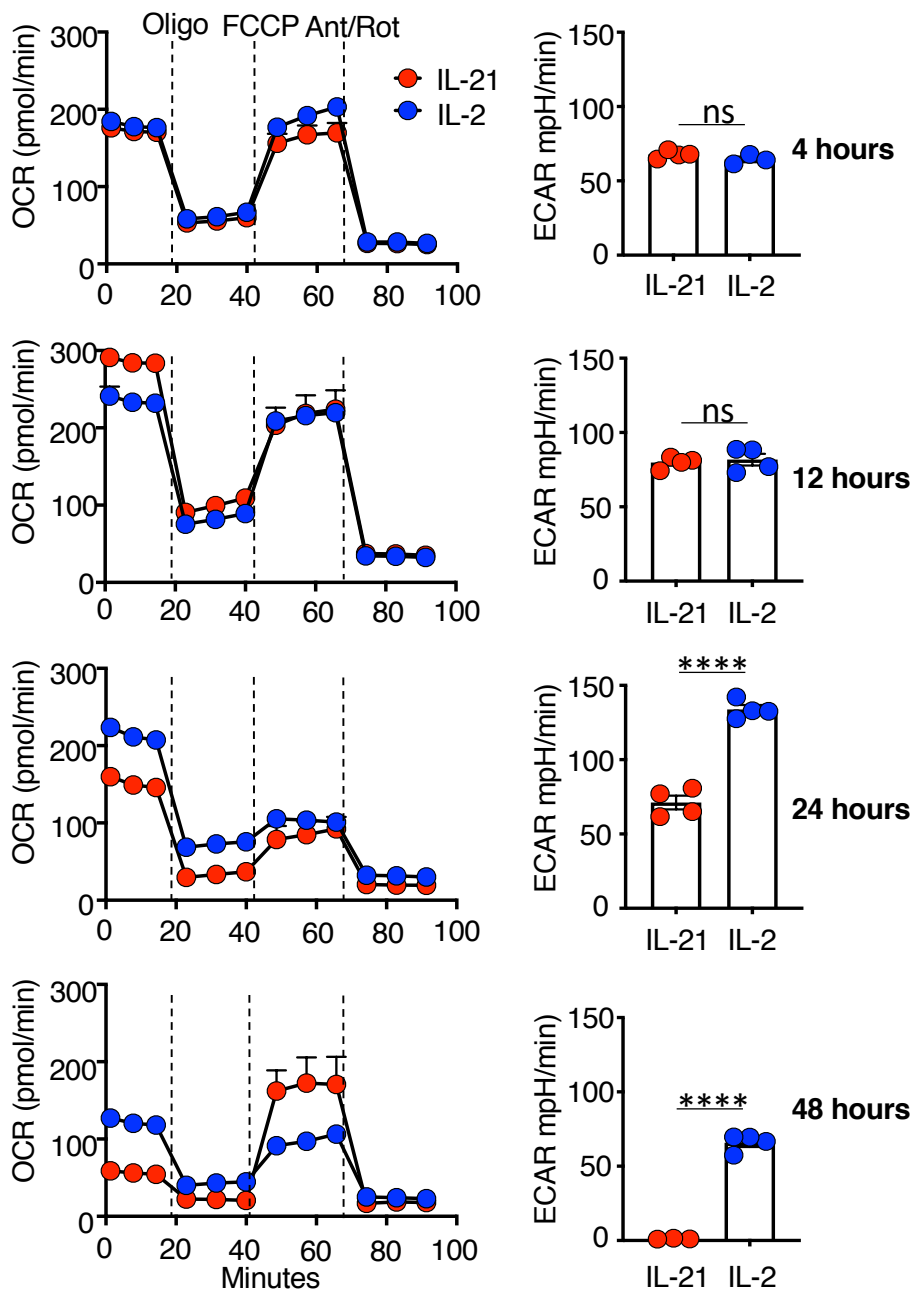

**B**

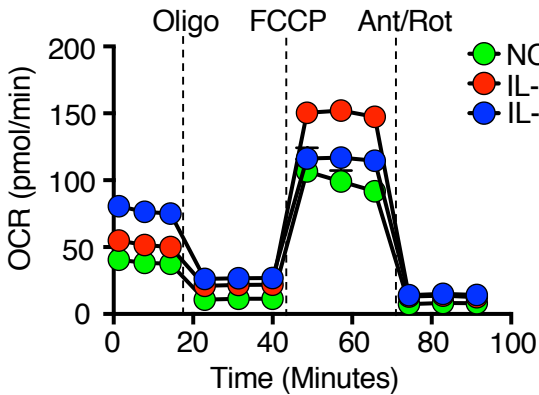

**C**

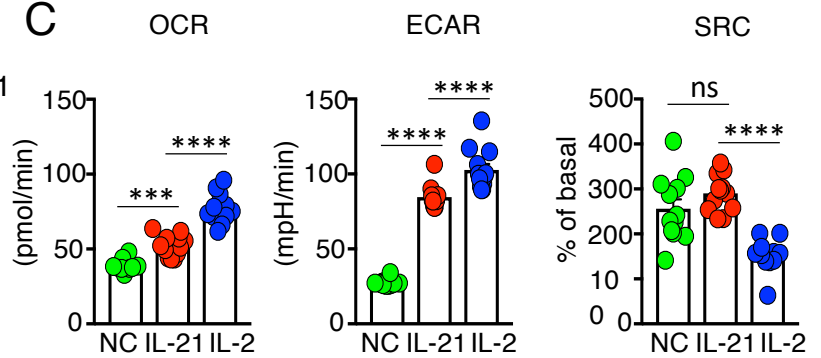

**Fig. S1.** Distinctive metabolic effects of IL-21 and IL-2 on mouse and human CD8<sup>+</sup> T cells. **(A)** OCR (left panels) and ECAR (right panels) induced by IL-21 and IL-2 in mouse CD8<sup>+</sup> T cells. The OCRs are shown for CD8<sup>+</sup> T cells treated with IL-21 (red) or IL-2 (blue) following treatment with oligomycin, FCCP, and antimycin A/rotenone. Cells were activated with anti-CD3 + anti-CD28 for 48 h and then stimulated with cytokine for 4, 12, 24, or 48 h, as indicated. This experiment is representative of 3 independent experiments. **(B)** Seahorse experiment showing OCRs for human CD8<sup>+</sup> T cells treated with no cytokine (green), IL-21, or IL-2, following treatment with oligomycin, FCCP, and antimycin A/rotenone. **(C)** Bar graphs indicate basal OCR measurements (left), basal ECAR measurements (middle), and SRC (right), as measured from Seahorse assays in **(B)**.

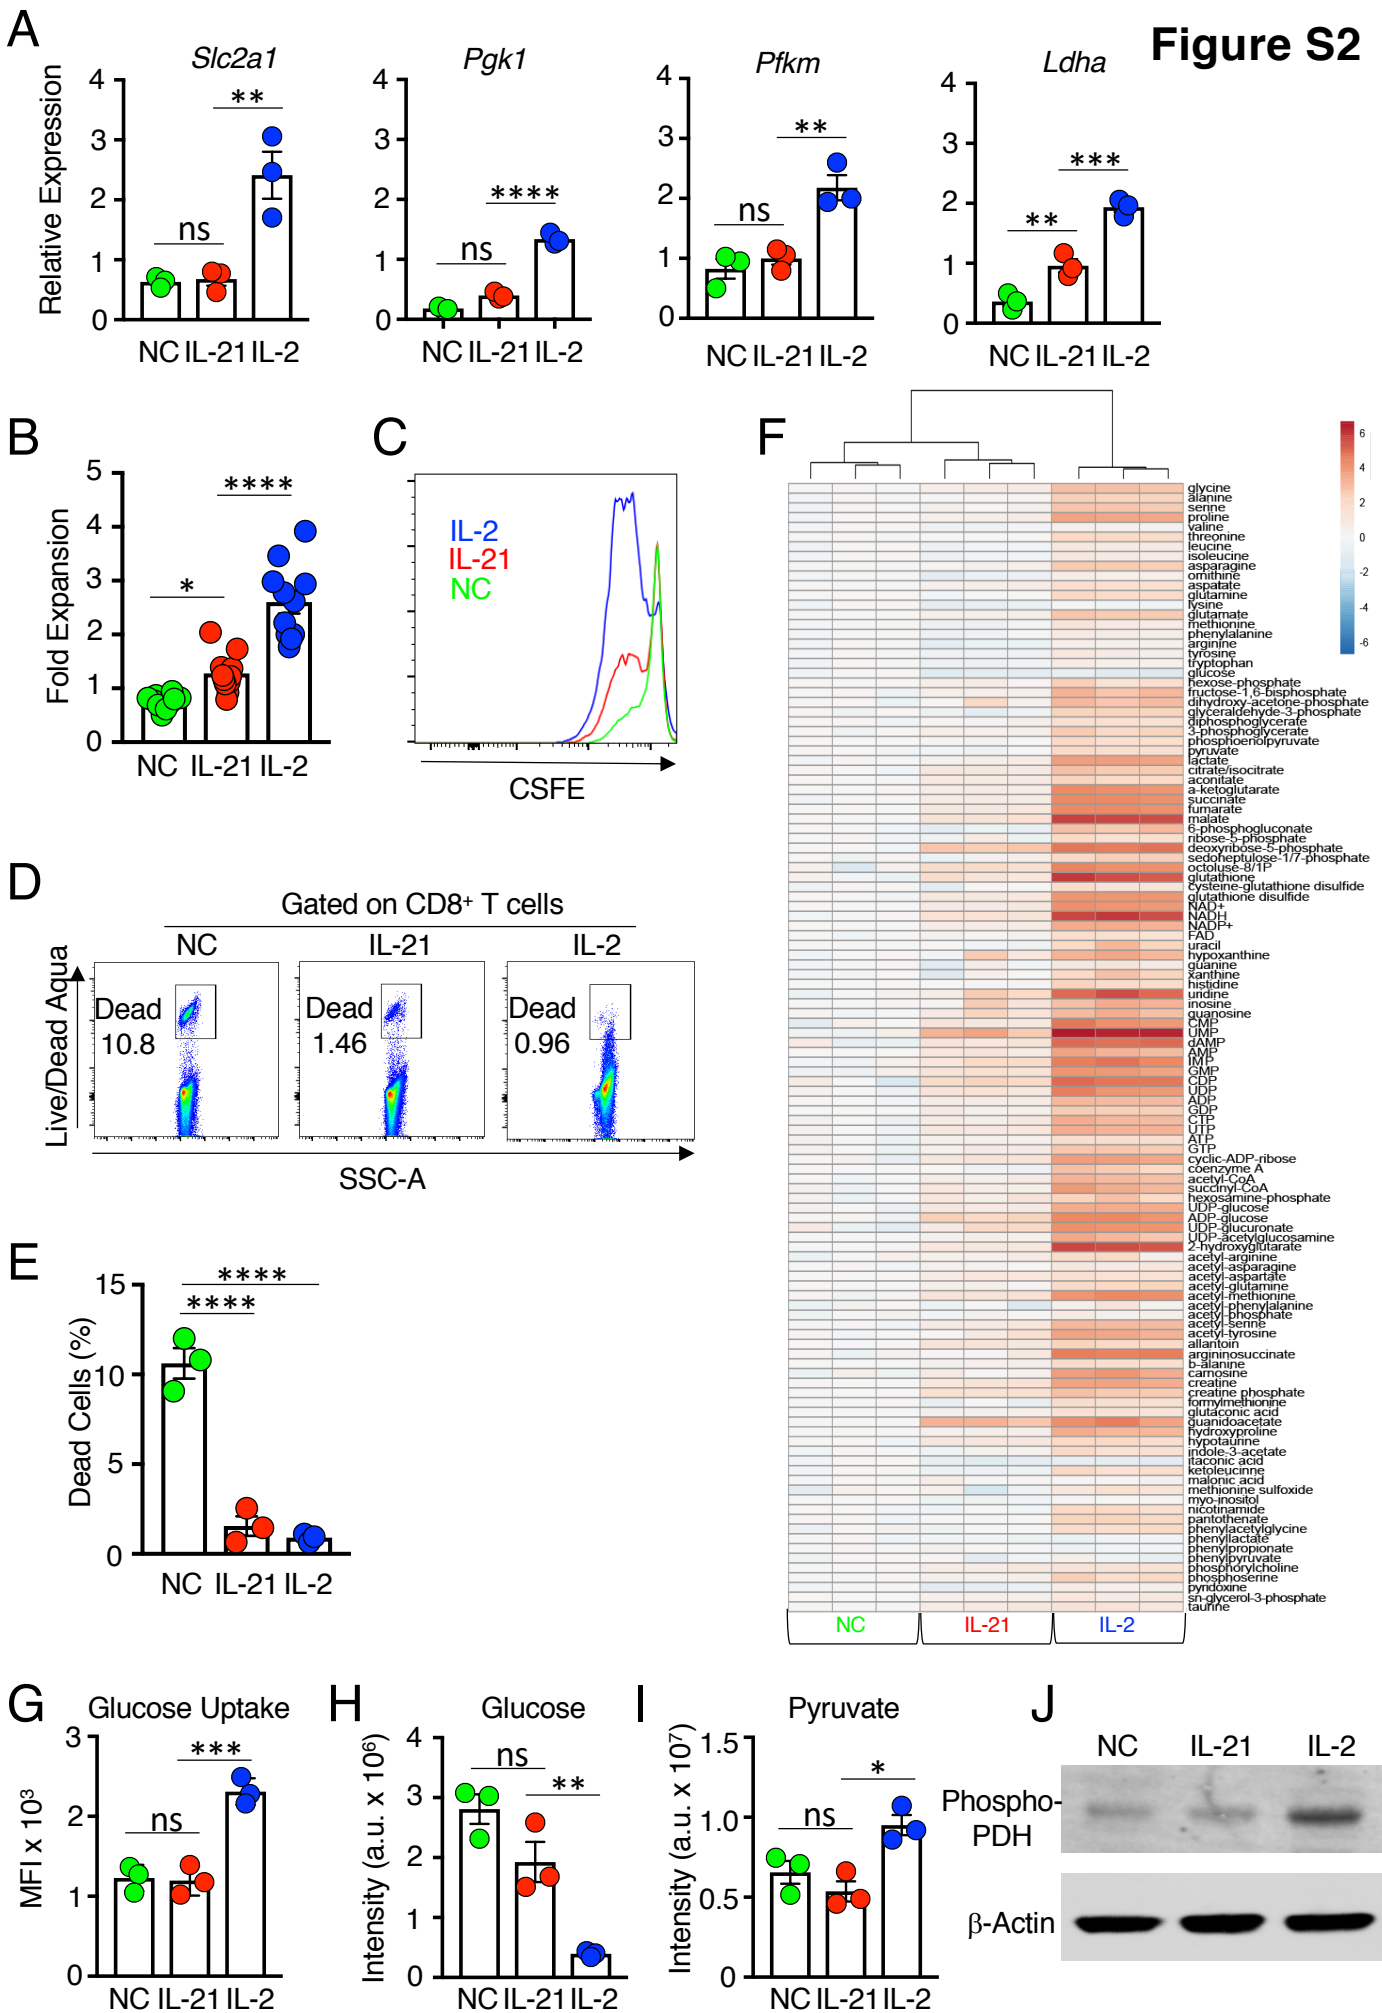

**Fig. S2.** Differential effects of IL-2 versus IL-21 on expression of metabolism-related genes, proliferation, cellular viability are consistent with metabolomic profiling. **(A)** mRNA expression levels by qRT-PCR of *Slc2a1*, *Pgk1*, *Pfkm*, and *Ldha* in mouse T cells treated with no cytokine, IL-2, or IL-21. Measurements were analyzed using the  $\Delta\Delta Cq$  method of quantification. **(B-E)** Proliferation and viability of CD8<sup>+</sup> T cells treated with IL-21 versus IL-2. **(B)** Cellular expansion *in vitro* following 48 h of treatment with no cytokine (green), IL-21 (red), or IL-2 (blue). Measurements were pooled from 4 independent experiments. **(C)** Flow cytometry graph of CFSE staining for activated cells treated for 48 h with no cytokine, IL-21, or IL-2. **(D)** SSC-A versus Live/Dead Aqua flow cytometry graphs gated on CD8<sup>+</sup> T cells; samples are from cells stimulated with no cytokine, IL-21, or IL-2. **(E)** Flow cytometry-derived percentage of dead cells following 48 h of treatment with no cytokine, IL-21, or IL-2. **(F-J)** Metabolomic repertoires in cells treated with no cytokine (NC), IL-21, or IL-2, revealing that IL-2 induces LDHA and regulates the fate of pyruvate. **(F)** Heatmap of differential concentrations of cellular metabolites expressed as log<sub>2</sub>FC using NC as reference (n=3). **(G-I)** FACS measurement of glucose uptake **(G)** and LC-MS-based analysis of intracellular glucose **(H)** and pyruvate **(I)** in mouse T cells pre-activated with anti-CD3 + anti-CD28 for 48 h and then treated with no cytokine, IL-21, or IL-2. **(J)** Western blot of phosphorylated PDH (upper panel) and  $\beta$ -actin loading control (lower blot).

**Figure S3**

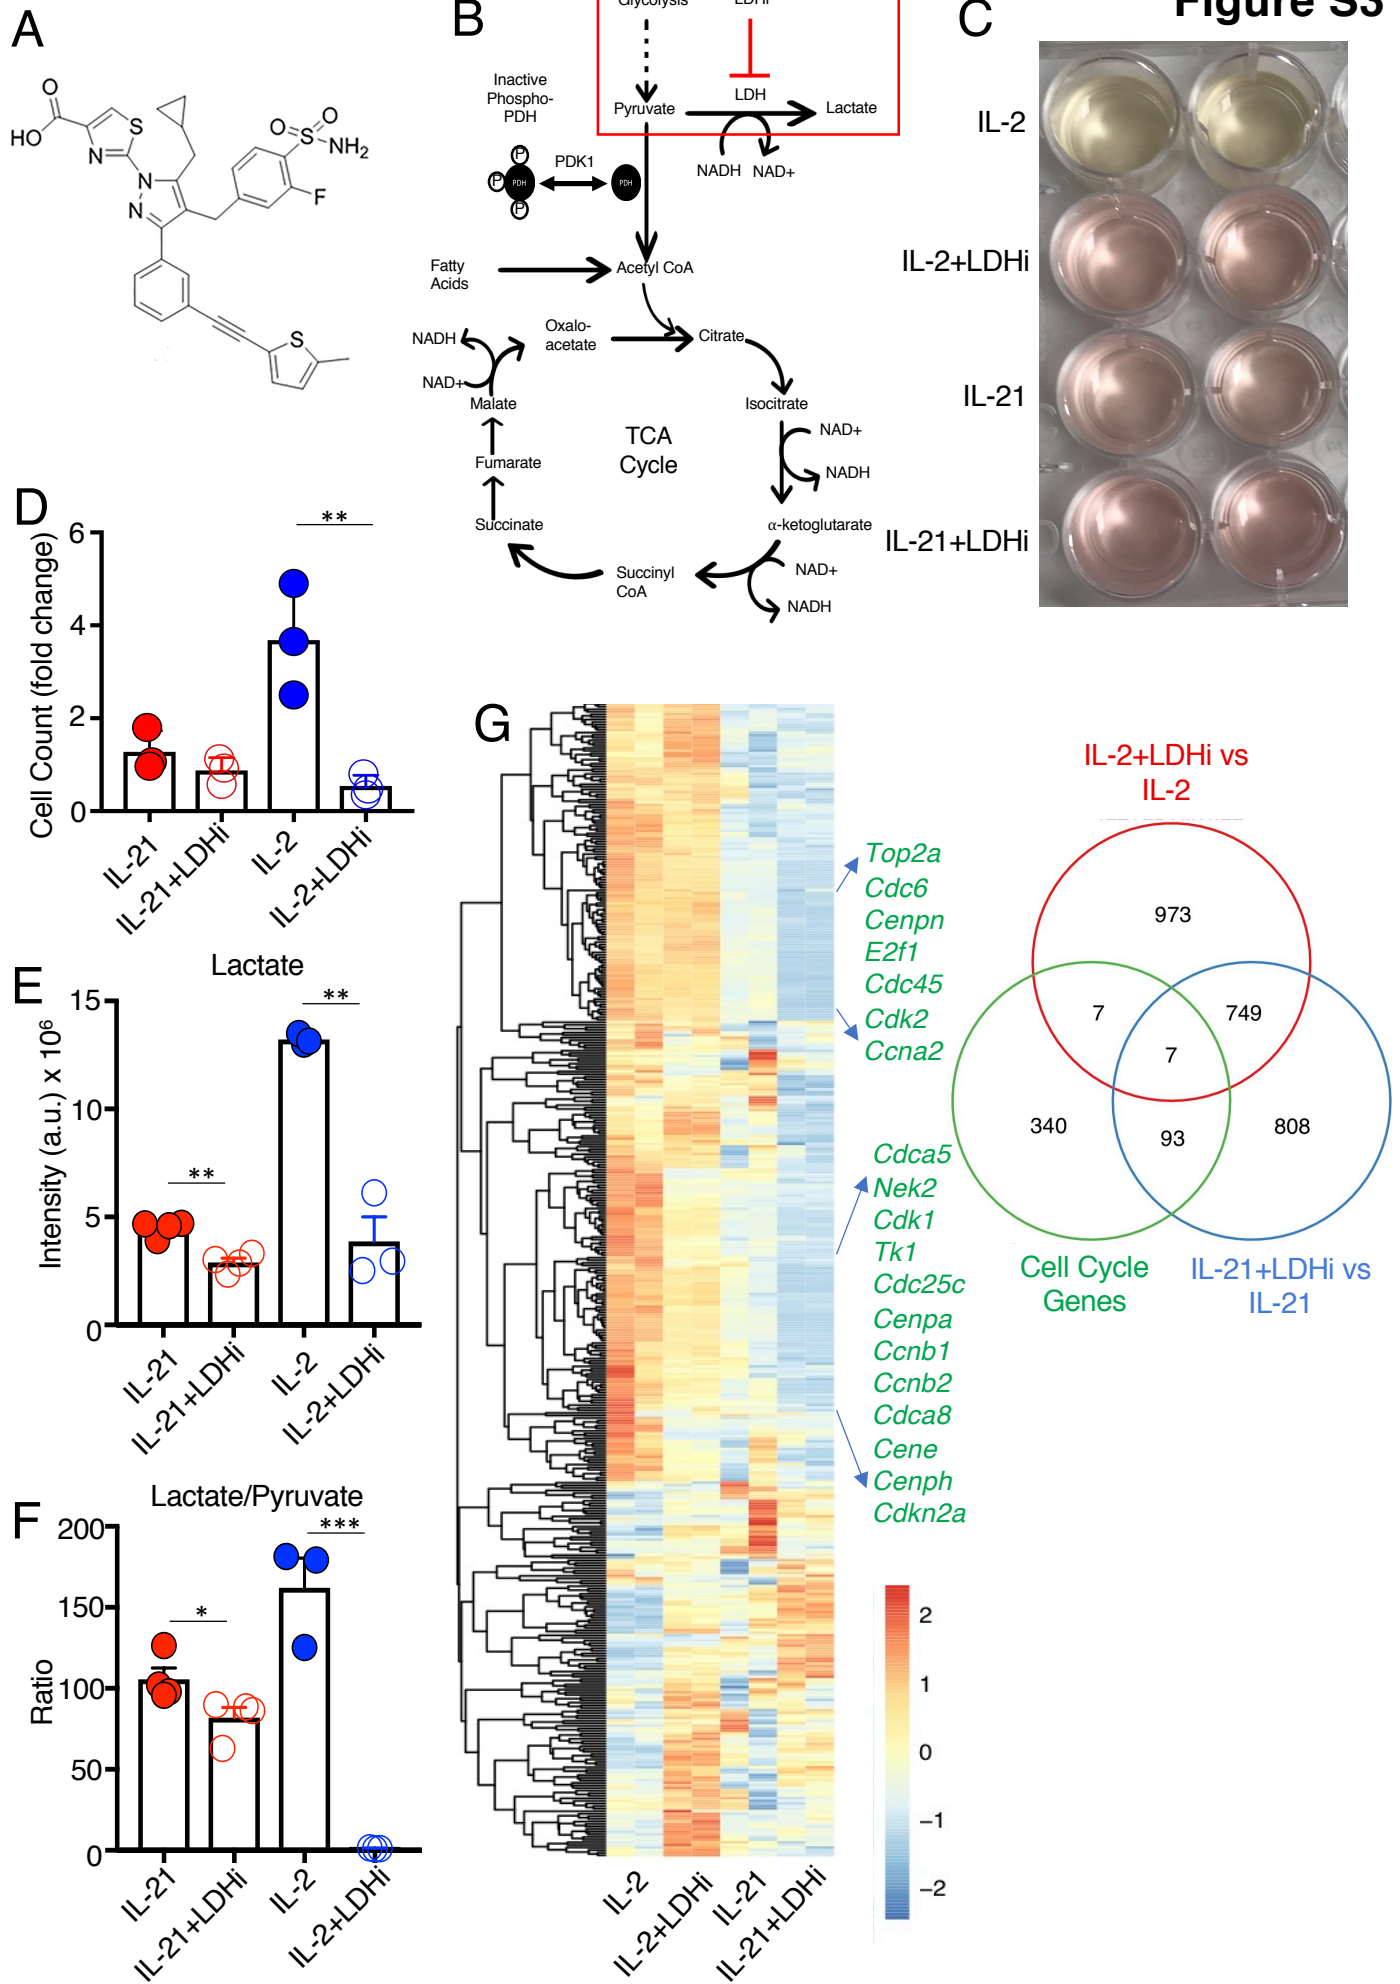

**Fig. S3.** Increased lactate production and lactate/pyruvate ratio in IL-2 treated cells and effects of an LDH inhibitor on IL-2- versus IL-21-regulated genes. **(A)** Structure of the LDH inhibitor, here denoted LDHi (NCI-737;  $C_{31}H_{26}FN_4O_4S_3$ ), IUPAC name 2-(5-(cyclopropylmethyl)-4-(3-fluoro-4-sulfamoylbenzyl)-3-(3-((5-methylthiophen-2-yl)ethynyl)phenyl)-1H-pyrazol-1-yl)thiazole-4-carboxylic acid (26). **(B)** Schematic of metabolic pathways and regulatory genes important for pyruvate access to the TCA cycle and fermentation. The region boxed in red shows the effect of LDHi. **(C)** Greater acidity of CD8<sup>+</sup> T cells treated with IL-2 is reversed by LDHi. Photograph of cell media color after activated CD8<sup>+</sup> T cells underwent 48 h stimulation with IL-2, IL-2+LDHi, IL-21, or IL-21+LDHi. **(D-F)** Cell numbers **(D)**, lactate level **(E)**, and lactate/pyruvate ratio **(F)** for cells treated with IL-21, IL-21+LDHi, IL-2, or IL-2+LDHi. **(G)** Differentially expressed cell cycle genes in cells treated with IL-2, IL-2+LDHi, IL-21, or IL-21+LDHi. Left panel, RNA-Seq heatmap); the color scale indicates the fold induction. Each stimulation was performed in duplicate. Listed are some of the differentially-expressed cell cycle related genes. Right panel, Venn diagram showing overlap of cell cycle related genes versus genes differentially expressed genes for cells treated with IL-2 versus IL-2+LDHi as well as IL-21 versus IL-21+LDHi.



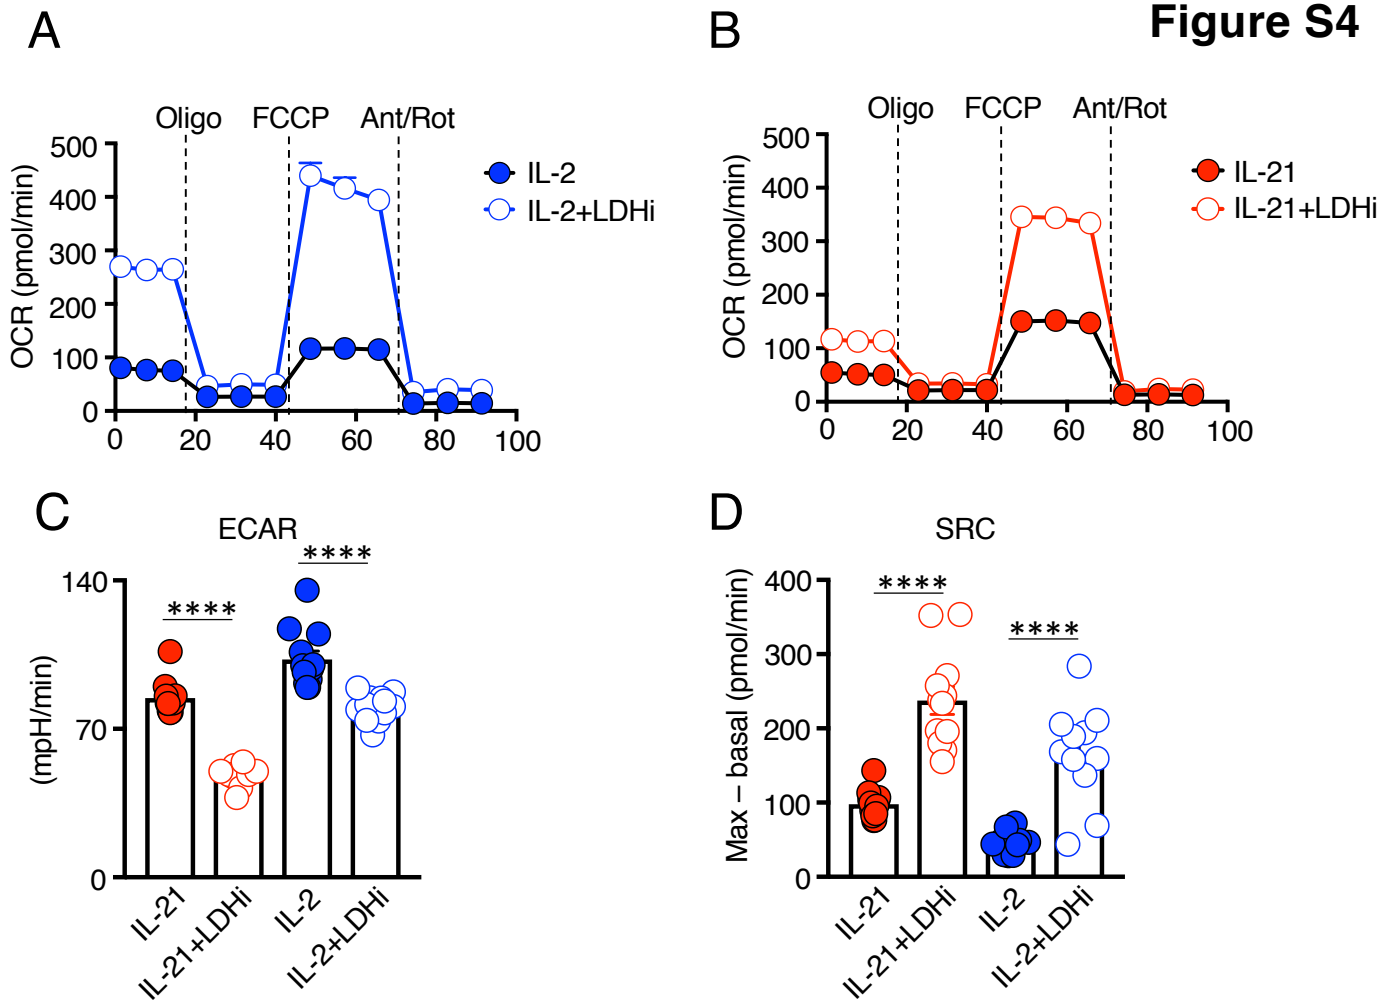

**Fig. S4.** Metabolic effects of LDHi on IL-2- and IL-21-stimulated human CD8<sup>+</sup> T cells. (**A** and **B**) OCRs for human CD8<sup>+</sup> T cells treated with (**A**) IL-2 (solid blue) or IL-2+LDHi (open blue) and (**B**) IL-21 (solid red) or IL-21+LDHi (open red). (**C** and **D**) ECAR (**C**) and SRC (**D**) measurements from Seahorse graphs in (**A**) and (**B**).
